# Supplementary material for: Dynamically weighted ensemble of geoscientific models via automated machine-learning-based classification
Source: Copernicus journal article supplement (doi:10.5194/gmd-16-5685-2023), 2023-10-12
Supplement: Supplementary file 1 [file gmd-16-5685-2023-supplement.pdf]

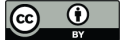

*Supplement of*

## **Dynamically weighted ensemble of geoscientific models via automated machine-learning-based classification**

**Hao Chen et al.**

*Correspondence to:* Tiejun Wang (tiejun.wang@tju.edu.cn)

The copyright of individual parts of the supplement might differ from the article licence.

**Table S1.** An overview of Pedotransfer functions (PTFs) selected for modeling moisture retention characteristics in this study.

| PTFs                | Methods of PTFs     | Source                       |
|---------------------|---------------------|------------------------------|
| Cosby0              | Lookup table        | Cosby et al. (1984)          |
| Carsel & Parrish    | Lookup table        | Carsel and Parrish (1988)    |
| Clapp & Hornberger  | Lookup table        | Clapp and Hornberger (1978)  |
| Rosetta3-H1w        | Lookup table        | Zhang and Schaap (2017)      |
| Cosby1              | Regression equation | Cosby et al. (1984)          |
| Cosby2              | Regression equation | Cosby et al. (1984)          |
| Rosetta3-H2w        | Neural networks     | Zhang and Schaap (2017)      |
| Rawls & Brakensiek  | Regression equation | Rawls and Brakensiek (1985)  |
| Campbell & Shiozawa | Regression equation | Campbell and Shiozawa (1992) |
| Rosetta3-H3w        | Neural networks     | Zhang and Schaap (2017)      |
| Wösten              | Regression equation | Wösten et al. (1999)         |
| Weynants            | Regression equation | Weynants et al. (2009)       |
| Vereecken           | Regression equation | Vereecken et al. (1989)      |

\* Abbreviated references, BC: Brooks and Corey (1964), BC-VG: BC parameters converted to VG parameters, CH: Clapp and Hornberger (1978), CMP: Campbell (1974), VG: van Genuchten (1980), VG\*: modified van Genuchten (1980).

**Table S2.** Size of the sample labeled as individual PTFs.

| PTFs                | Sample size |
|---------------------|-------------|
| Cosby0              | 7,360       |
| Carsel & Parrish    | 9,051       |
| Clapp & Hornberger  | 12,211      |
| Rosetta3-H1w        | 7,476       |
| Cosby1              | 6,884       |
| Cosby2              | 6,882       |
| Rosetta3-H2w        | 6,498       |
| Rawls & Brakensiek  | 10,976      |
| Campbell & Shiozawa | 14,255      |
| Rosetta3-H3w        | 7,563       |
| Wösten              | 11,090      |
| Weynants            | 9,634       |
| Vereecken           | 8,719       |

**Table S3.** Computational demands and accuracy of ensemble predictions of designed machine learning classification models.

| Classifier      | Computational time<br>(minutes) | R <sup>2</sup><br>(-) | RMSE<br>(m <sup>3</sup> /m <sup>3</sup> ) |
|-----------------|---------------------------------|-----------------------|-------------------------------------------|
| Original_withSE | 84.23                           | 0.8629                | 0.0444                                    |
| Balanced_withSE | 84.37                           | 0.8654                | 0.0440                                    |
| Balanced_noSE   | 44.54                           | 0.8480                | 0.0467                                    |
| XGBoost_withSE  | 80.28                           | 0.8600                | 0.0449                                    |
| XGBoost_noSE    | 52.40                           | 0.8480                | 0.0467                                    |
| LGBM_noSE_30    | 12.07                           | 0.8465                | 0.0472                                    |
| LGBM_noSE_300   | 300.33                          | 0.8505                | 0.0466                                    |

Specifically, we selected the case of assembling 13 PTFs and compared 7 different classifier configurations. These classifiers were evaluated based on their computational time and the accuracy of their ensemble predictions. Here, we utilized the H2O-AutoML platform and made use of its scenario (parameter) settings, particularly the `include_algos` or `exclude_algos` parameters (refer to the provided link: <https://docs.h2o.ai/h2o/latest-stable/h2o-docs/parameters.html>), to train the first 5 classifiers: 1) Original classifier (**Original\_withSE**): This refers to the original classifier used in our study (consist of 6 different ML algorithms, 32 models including 2 stacked ensemble models). 2) Balanced classifier (**Balanced\_withSE**): In this configuration, we enabled the `balance_classes` parameter in the original classifiers to handle the potential class imbalance issue. 3) Balanced classifier without the StackedEnsemble algorithm (**Balanced\_noSE**): Here, we excluded the StackedEnsemble algorithm from the balanced classifier, meaning that no further ensemble of ML models was performed. 4) Original classifiers with only the XGBoost algorithm (**XGBoost\_withSE**): Based on the original classifiers, we eliminated other algorithms except for the XGBoost and the StackedEnsemble algorithms. 5) XGBoost classifier without the StackedEnsemble algorithm (**XGBoost\_noSE**): In this case, we considered only the XGBoost algorithm in the original classifier, without utilizing the StackedEnsemble algorithm. Throughout the H2O-AutoML training process, we still set the total number of models (`max_models`, [https://docs.h2o.ai/h2o/latest-stable/h2o-docs/data-science/algo-params/max\\_models.html](https://docs.h2o.ai/h2o/latest-stable/h2o-docs/data-science/algo-params/max_models.html)) to 30. For the 6th and 7th classifier, we opted to train the model in a Python environment using a combination of the state-of-the-art LightGBM algorithm (Ke et al., 2017) along with the efficient Optuna tool for accelerated hyperparameter optimization (Akiba et al., 2019). Note that a parameter called “`n_trials`”, which represent the number of trials for each process in optimizing an objective function (<https://optuna.readthedocs.io/en/stable/reference/generated/optuna.study.Study.html>), were set to 30 and 300, respectively, thus, we obtained the other two classifiers, namely **LGBM\_noSE\_30** and **LGBM\_noSE\_300**. The configuration details can be found in the code we have shared and updated recently (<https://doi.org/10.6084/m9.figshare.21547134.v3>).

**Table S4.** List of 47 eddy covariance flux sites covering croplands from AmeriFlux (AM), AsiaFlux (AS), FLUXNET (FN), and European Flux Database Cluster (EF) networks. ‘FN-AM’ or ‘FN-EF’ indicates the site is available in both FN and AM or FN and EF and was retrieved from FN.

| Site code | Cropland type | Country          | Latitude | Longitude | Years     | Network | MAP (mm) | MAT (°C) | Citation                                                                          |
|-----------|---------------|------------------|----------|-----------|-----------|---------|----------|----------|-----------------------------------------------------------------------------------|
| BE-Lon    | Dry           | Belgium          | 50.5516  | 4.7461    | 2004-2014 | FN-EF   | 800      | 10       | Moureaux et al. (2006)                                                            |
| CH-Oe2    | Dry           | Switzer-<br>land | 47.2863  | 7.7343    | 2004-2014 | FN-EF   | 1155     | 9.8      | Moors et al. (2010)                                                               |
| CN-YCS    | Dry           | China            | 36.8290  | 116.5702  | 2003-2005 | AS      | 528      | 13.1     | <a href="http://asiaflux.net/?page_id=1178">http://asiaflux.net/?page_id=1178</a> |
| DE-Geb    | Dry           | Germany          | 51.1001  | 10.9143   | 2001-2014 | FN-EF   | 470      | 8.5      | Anthoni et al. (2004)                                                             |
| DE-Kli    | Dry           | Germany          | 50.8929  | 13.5225   | 2004-2014 | FN-EF   | 842      | 7.6      | Brust et al. (2012)                                                               |
| DE-RuS    | Dry           | Germany          | 50.8659  | 6.4472    | 2011-2014 | FN-EF   | 700      | 10       | Eder et al. (2015)                                                                |
| DE-Seh    | Dry           | Germany          | 50.8706  | 6.4497    | 2007-2010 | FN-EF   | 693      | 9.9      | Korres et al. (2013)                                                              |
| DK-Ris    | Dry           | Denmark          | 55.5303  | 12.0972   | 2004-2008 | EF      | 580      | 8        | Kutsch et al. (2010)                                                              |
| ES-ES2    | Paddy         | Spain            | 39.2755  | -0.3152   | 2004-2010 | EF      | 550      | 18       | Carvalhais et al. (2010)                                                          |
| FR-Aur    | Dry           | France           | 43.5496  | 1.1062    | 2005-2010 | EF      |          | 12.9     | B’eziat et al. (2009)                                                             |
| FR-Avi    | Dry           | France           | 43.9164  | 4.8792    | 2004-2006 | EF      | 687      | 14       | Kutsch et al. (2010)                                                              |
| FR-Gri    | Dry           | France           | 48.8442  | 1.9519    | 2004-2014 | FN-EF   | 650      | 12       | Loubet et al. (2011)                                                              |
| FR-Lam    | Dry           | France           | 43.4965  | 1.2379    | 2005-2010 | EF      |          | 12.55    | B’eziat et al. (2009)                                                             |
| IT-BCi    | Dry           | Italy            | 40.5238  | 14.9574   | 2004-2014 | FN-EF   | 600      | 18       | Ranucci et al. (2010)                                                             |
| IT-CA2    | Dry           | Italy            | 42.3772  | 12.0260   | 2011-2014 | FN-EF   | 766      | 14       | Sabbatini et al. (2016)                                                           |

|        |       |                |         |           |           |       |        |       |                              |
|--------|-------|----------------|---------|-----------|-----------|-------|--------|-------|------------------------------|
| IT-Cas | Paddy | Italy          | 45.0628 | 8.6685    | 2006-2010 | EF    |        | 11.9  | Mejjide et al. (2011)        |
| JP-MSE | Paddy | Japan          | 36.0540 | 140.0269  | 2002-2006 | AS    |        |       | Muramatsu et al. (2017)      |
| KR-CRK | Paddy | South<br>Korea | 38.2013 | 127.2507  | 2015      | EF    | 1180.9 | 11.2  | Yang et al. (2018)           |
| US-ARM | Dry   | USA            | 36.6058 | -97.4888  | 2003-2012 | FN-AM | 843    | 14.76 | Raz-Yaseef et al. (2015)     |
| US-Bi1 | Dry   | USA            | 38.1022 | -121.5042 | 2016-2018 | AM    | 338    | 16    | Hemes et al. (2019)          |
| US-Bi2 | Dry   | USA            | 38.1090 | -121.5350 | 2017-2018 | AM    | 338    | 16    | Hemes et al. (2019)          |
| US-Bo1 | Dry   | USA            | 40.0062 | -88.2904  | 2000-2008 | AM    | 991.29 | 11.02 | Bernacchi et al. (2005)      |
| US-Bo2 | Dry   | USA            | 40.0090 | -88.2900  | 2004-2006 | AM    | 991.29 | 11.02 | Bernacchi et al. (2005)      |
| US-Br1 | Dry   | USA            | 41.9749 | -93.6906  | 2005-2011 | AM    | 842.33 | 8.95  | Chu et al. (2018)            |
| US-Br3 | Dry   | USA            | 41.9747 | -93.6936  | 2005-2011 | AM    | 846.6  | 8.9   | Chu et al. (2018)            |
| US-CRT | Dry   | USA            | 41.6285 | -83.3471  | 2011-2013 | FN-AM | 849    | 10.1  | Chu et al. (2014)            |
| US-Lin | Dry   | USA            | 36.3600 | -119.8400 | 2009-2010 | FN-AM |        |       | Fares (2016)                 |
| US-Ne1 | Dry   | USA            | 41.1651 | -96.4766  | 2001-2013 | FN-AM | 790    | 10.07 | Verma et al. (2005)          |
| US-Ne2 | Dry   | USA            | 41.1649 | -96.4701  | 2001-2013 | FN-AM | 789    | 10.08 | Suyker and Verma (2012)      |
| US-Ne3 | Dry   | USA            | 41.1797 | -96.4397  | 2001-2013 | FN-AM | 784    | 10.11 | Suyker and Verma (2012)      |
| US-Pon | Dry   | USA            | 36.7667 | -97.1333  | 2000      | AM    | 866.34 | 14.94 | Hanan et al. (2005)          |
| US-RC1 | Dry   | USA            | 46.7837 | -117.0777 | 2011-2016 | AM    | 550    | 9     | Lamb and Pressley<br>(2016a) |
| US-RC2 | Dry   | USA            | 46.7776 | -117.0807 | 2012-2016 | AM    | 550    | 9     | Lamb and Pressley<br>(2016b) |

|        |       |     |         |           |           |       |     |      |                           |
|--------|-------|-----|---------|-----------|-----------|-------|-----|------|---------------------------|
| US-RC3 | Dry   | USA | 46.9910 | -118.5980 | 2011-2016 | AM    | 280 | 10   | Lamb and Pressley (2016c) |
| US-RC4 | Dry   | USA | 46.7580 | -116.9490 | 2012-2016 | AM    | 680 | 9    | Lamb and Pressley (2016d) |
| US-Ro1 | Dry   | USA | 44.7143 | -93.0898  | 2004-2016 | AM    | 879 | 6.4  | Bavin et al. (2009)       |
| US-Ro2 | Dry   | USA | 44.7288 | -93.0888  | 2015-2016 | AM    | 879 | 6.4  | Griffis et al. (2010)     |
| US-Ro3 | Dry   | USA | 44.7217 | -93.0893  | 2004-2007 | AM    | 879 | 6.4  | Griffis et al. (2010)     |
| US-Ro4 | Dry   | USA | 44.6781 | -93.0723  | 2014-2018 | AM    | 879 | 6.4  | Griffis et al. (2010)     |
| US-Ro5 | Dry   | USA | 44.6910 | -93.0576  | 2017-2018 | AM    | 879 | 6.4  | Baker and Griffis (2016a) |
| US-Ro6 | Dry   | USA | 44.6946 | -93.0578  | 2017-2018 | AM    | 879 | 6.4  | Baker and Griffis (2016b) |
| US-SuM | Dry   | USA | 20.7981 | -156.4540 | 2013-2014 | AM    | 287 | 24.1 | Anderson and Wang (2014)  |
| US-SuS | Dry   | USA | 20.7847 | -156.4039 | 2011-2014 | AM    | 334 | 24.4 | Anderson and Wang (2014)  |
| US-SuW | Dry   | USA | 20.8246 | -156.4913 | 2011-2013 | AM    | 366 | 24.4 | Anderson and Wang (2014)  |
| US-Tw2 | Dry   | USA | 38.1047 | -121.6433 | 2012-2013 | FN-AM | 421 | 15.5 | Knox et al. (2014)        |
| US-Tw3 | Dry   | USA | 38.1159 | -121.6467 | 2013-2014 | FN-AM | 421 | 15.6 | Baldocchi et al. (2015)   |
| US-Twt | Paddy | USA | 38.1087 | -121.653  | 2009-2014 | FN-AM | 421 | 15.6 | Hatala et al. (2012)      |

---

**Table S5.** A simplified summary of the six individual ET models selected in this study. An overview of the six ET models we used was presented in Appendix A and a summary of the key equations and their detailed descriptions of variables used in these models were presented in Table 2 and Table 3 in Bai et al. (2021), respectively.

| Model name | Driving forces *                        | Reference                                                  |
|------------|-----------------------------------------|------------------------------------------------------------|
| PT-JPL     | VPD, $T_a$ , $R_n$ , NDVI, SAVI         | Fisher et al. (2008); Vinukollu et al. (2011)              |
| PT-DTsR    | $T_a$ , $R_n$ , DTsR, NDVI              | Yao et al. (2013)                                          |
| STIC       | $T_a$ , VPD, $u$ , $R_n$ , $T_R$ , NDVI | Mallick et al. (2014, 2015, 2016); Bhattarai et al. (2018) |
| SEBS       | $T_a$ , VPD, $u$ , $R_n$ , $T_R$ , NDVI | Su (2002); Chen et al. (2013)                              |
| RS-WBPM    | $T_a$ , VPD, $u$ , $R_n$ , EVI, $P_d$   | Bai et al. (2017)                                          |
| EVI-PM     | $T_a$ , VPD, $u$ , $R_n$ , EVI          | Yebra et al. (2013); Bai et al. (2017)                     |

\* Abbreviations, VPD: Vapor pressure deficit;  $T_a$ : Air temperature,  $R_n$ : Net radiation; NDVI: Normalized vegetation index; SAVI: Soil adjusted vegetation index; DTsR: Diurnal range of surface temperature retrieved from the MODIS thermal band;  $u$ : Wind speed;  $T_R$ : Land surface radiometric temperature; EVI: Enhanced vegetation index.



**Table S6.** Size of the sample labeled as individual ET models.

| Model name | Sample size |
|------------|-------------|
| PT-JPL     | 14,062      |
| PT-DTsR    | 12,905      |
| STIC       | 16,065      |
| SEBS       | 12,903      |
| RS-WBPM    | 16,869      |
| EVI-PM     | 10,817      |

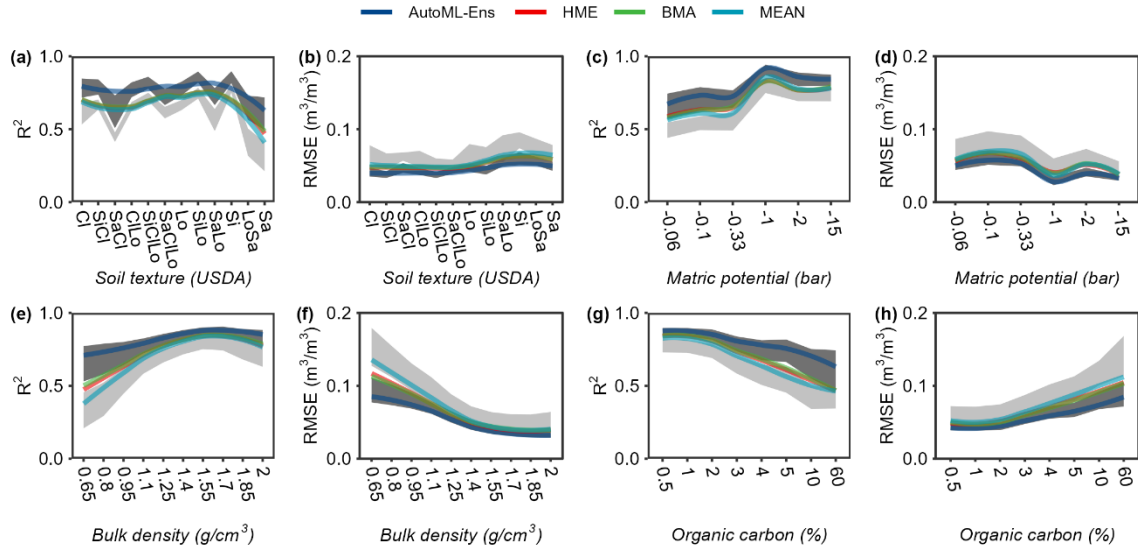

**Figure S1.**  $R^2$  (a, c, e, g) and RMSE (b, d, f, h) when the moisture content estimates of different ensemble approaches were compared with observations (including all training and testing data) under various environmental conditions (6 variables, among which, the content of sand, silt, and clay was expressed together in terms of USDA soil texture classes) that were represented by predictors for AutoML-Ens. The light gray band denotes the uncertainties calculated as the mean $\pm$ standard deviation of the  $R^2$  (or RMSE) values of the 13 selected PTFs. The dark gray band denotes the uncertainties of the 6 individual ML algorithms.

**S1.** An overview of the MEAN, BMA, HME, and MLP methods.

1) The simple average (MEAN)

Previous studies revealed that a sample average of multi-model simulations may give better estimates than any individual model (e.g., Martre et al., 2015). In this study, we also evaluate the performance of an average of the soil water content (or LE) estimates ( $\mathbf{y}$ ) from 13 PTFs (or six RS-based ET models) predictions ( $\mathbf{p}$ ).

$$y_k = \frac{1}{N} \times \sum_{n=1}^N p_{k,n} \quad (\text{S1})$$

where subscript  $k$  and  $n$  denote the index of a sample and model, respectively;  $N$  is the number of models.

2) Bayesian model averaging (BMA)

BMA (Raftery et al., 2005), which can be regarded as a direct application of Bayesian inference to the problem of ensemble estimation, is expected to be more effective than MEAN in assembling multiple models (Fragoso et al., 2018). Previous studies consider the problem of combining predictions from  $N$  models,  $f_1, f_2, \dots, f_N$  into one combined prediction. For each prediction, there is a probability density function (PDF) for the quantity one wished to predict  $y$  denoted by  $g_l(y|f_l)$  for  $l = 1, \dots, N$ . Afterwards, a combined density function using the weighted average is constructed as

$$g(y|f_1, \dots, f_N) = \sum_{l=1}^N w_l g_l(y|f_l) \quad (\text{S2})$$

where  $w_l$  denotes the weight of the model  $f_l$ , in which  $\sum_{l=1}^N w_l = 1$ , and the weights are interpreted in an analogous fashion to the posterior probabilities of the model  $f_l$ . Assuming then each density as a normal, the weights are estimated using the expectation-maximization (EM) algorithm (Dempster et al., 1977).

Finally, the weights of the 13 PTFs (or six ET models) were obtained through the BMA approach, which are 0.02164, 0.00975, 0.05202, 0.01820, 0.05679, 0.03220, 0.04324, 0.07356, 0.01553, 0.24029, 0.24841, 0.16219, and 0.02618 for Cosby0, Carsen & Parrish, Clapp & Hornberger, Rosetta3-H1w, Cosby1, Cosby2, Rosetta3-H2w, Rawls & Brakensiek, Campbell & Shiozawa, Rosetta3-H3w, Wösten, Weynants, and Vereecken PTF (or 0.217, 0.129, 0.199, 0.141,

0.150, and 0.164 for PT-JPL, PT-DTsR, STIC, SEBS, RS-WBPM, and EVI-PM model), respectively.

### 3) Hierarchical multi-model ensemble (HME)

The HME method was proposed by Zhang et al. (2020) for assembling the 13 selected PTFs. The weights of multi-PTF ensemble estimation are determined by minimizing the following:

$$\chi^2(\mathbf{W}) = \bar{\boldsymbol{\varepsilon}}(\bar{\boldsymbol{\varepsilon}})^T$$

$$\text{where } \bar{\boldsymbol{\varepsilon}} = \frac{1}{\sum_{j=1}^N w_j} \sum_{j=1}^N w_j (\boldsymbol{\theta}' - \boldsymbol{\theta})^2 \quad (\text{S3})$$

and  $\mathbf{W}$  is a vector of weights,  $w_j$ , for corresponding PTF model  $P_j$ , where  $j = 1, \dots, N$ ,  $0 \leq w_j \leq 1$ ,  $N$  is the number of PTF ensembles;  $\boldsymbol{\theta}$  and  $\boldsymbol{\theta}'$  are vectors of measured and predicted soil water content, the length of which is the size of calibration samples selected by the bootstrap (with 100 replicas) resampling process. Different algorithms were evaluated for minimization of equation (S3), and we found that a genetic algorithm (Scrucca, 2013) was the most effective method to optimize  $\mathbf{W}$ .

Finally, we got the weights of the 13 PTFs through the HME approach, which are 0.0330, 0.0106, 0.1437, 0.0250, 0.0257, 0.0264, 0.0414, 0.0325, 0.0858, 0.1704, 0.1980, 0.1854, and 0.0223 for Cosby0, Carsen & Parrish, Clapp & Hornberger, Rosetta3-H1w, Cosby1, Cosby2, Rosetta3-H2w, Rawls & Brakensiek, Campbell & Shiozawa, Rosetta3-H3w, Wösten, Weynants, and Vereecken PTF, respectively.

### 4) The multi-layer perception neural network classifier (MLP)

MLP is a supplement of supervised feedforward neural network. It has been considered as learning a nonlinear functional mapping between a set of predictors  $\mathbf{x}$  (or input layer) and a corresponding target variable  $y$  (or output layer), with an arbitrary number of hidden layers.

$$y = f(\mathbf{x}) + \varepsilon \quad (\text{S4})$$

Each layer in the MLP contains neurons. With a multi-layer architecture, the neurons are trained to approximate any continuous multivariate function for either classification or regression. MLP intrinsically classifies an unknown sample based on the sample's computed probability of being each of the target classes, and the sample is assigned to the class with the highest probability. MLP, as a supervised learning algorithm, requires labeled training data to determine model parameters, such as the 'connection weight' between neurons, activation functions of hidden layers, and the numbers of hidden layers and neurons (Du and Swamy, 2014). In this study, the optimal

MLP turned out to have 2 hidden layers and 80 neurons in each layer with the activation of rectified linear unit function (relu).

## References

- Anderson, R. G., and D. Wang (2014), Energy budget closure observed in paired Eddy Covariance towers with increased and continuous daily turbulence, *Agricultural and Forest Meteorology*, 184, 204-209. <https://doi.org/10.1016/j.agrformet.2013.09.012>
- Anthoni, P. M., A. Knohl, C. Rebmann, A. Freibauer, M. Mund, W. Ziegler, O. Kolle, and E.-D. Schulze (2004), Forest and agricultural land-use-dependent CO<sub>2</sub> exchange in Thuringia, Germany, *Global Change Biology*, 10(12), 2005-2019. <https://doi.org/10.1111/j.1365-2486.2004.00863.x>
- Bai, Y., J. Zhang, S. Zhang, U. A. Koju, F. Yao, and T. Igbawua (2017), Using precipitation, vertical root distribution, and satellite-retrieved vegetation information to parameterize water stress in a Penman-Monteith approach to evapotranspiration modeling under Mediterranean climate, *Journal of Advances in Modeling Earth Systems*, 9(1), 168-192. <https://doi.org/10.1002/2016MS000702>
- Baker, J., and T. Griffis (2018a), AmeriFlux AmeriFlux US-Ro5 Rosemount I18\_South, edited, United States. <https://doi.org/10.17190/AMF/1419508>
- Baker, J., and T. Griffis (2018b), AmeriFlux AmeriFlux US-Ro6 Rosemount I18\_North, edited, United States. <https://doi.org/10.17190/AMF/1419509>
- Baldocchi, D., C. Sturtevant, and F. Contributors (2015), Does day and night sampling reduce spurious correlation between canopy photosynthesis and ecosystem respiration?, *Agricultural and Forest Meteorology*, 207, 117-126. <https://doi.org/10.1016/j.agrformet.2015.03.010>
- Bavin, T. K., T. J. Griffis, J. M. Baker, and R. T. Venterea (2009), Impact of reduced tillage and cover cropping on the greenhouse gas budget of a maize/soybean rotation ecosystem, *Agriculture, Ecosystems & Environment*, 134(3), 234-242. <https://doi.org/10.1016/j.agee.2009.07.005>
- Bernacchi, C. J., S. E. Hollinger, and T. Meyers (2005), The conversion of the corn/soybean ecosystem to no-till agriculture may result in a carbon sink, *Global Change Biology*, 11(11), 1867-1872. <https://doi.org/10.1111/j.1365-2486.2005.01050.x>
- Béziat, P., E. Ceschia, and G. Dedieu (2009), Carbon balance of a three crop succession over two cropland sites in South West France, *Agricultural and Forest Meteorology*, 149(10), 1628-1645. <https://doi.org/10.1016/j.agrformet.2009.05.004>
- Bhattarai, N., K. Mallick, N. A. Brunsell, G. Sun, and M. Jain (2018), Regional evapotranspiration from an image-based implementation of the Surface Temperature Initiated Closure (STIC1.2) model and its validation across an aridity gradient in the conterminous US, *Hydrol. Earth Syst. Sci.*, 22(4), 2311-2341. <https://doi.org/10.5194/hess-22-2311-2018>

- Brooks, R., and Corey, A (1964). Hydraulic properties of porous media. *Hydrology Papers, Colorado State University*, 3, 1-27.
- Brust, K., M. Hehn, and C. Bernhofer (2012), Comparative analysis of matter and energy fluxes determined by Bowen Ratio and Eddy Covariance techniques at a crop site in eastern Germany, paper presented at EGU general assembly conference abstracts.
- Campbell, G. S. (1974), A simple method for determining unsaturated conductivity from moisture retention data, *Soil Science*, 117(6), 311-314. <https://doi.org/10.1097/00010694-197406000-00001>
- Campbell, G. S., and Shiozawa S. (1992). Prediction of hydraulic properties of soils using particle-size distribution and bulk density data. In *Indirect methods for estimating the hydraulic properties of unsaturated soils* (pp. 717-328). Riverside: University of California.
- Carvalho, N., M. Reichstein, G. J. Collatz, M. D. Mahecha, M. Migliavacca, C. S. R. Neigh, E. Tomelleri, A. A. Benali, D. Papale, and J. Seixas (2010), Deciphering the components of regional net ecosystem fluxes following a bottom-up approach for the Iberian Peninsula, *Biogeosciences*, 7(11), 3707-3729. <https://doi.org/10.5194/bg-7-3707-2010>
- Chen, X., Z. Su, Y. Ma, K. Yang, J. Wen, and Y. Zhang (2013), An Improvement of Roughness Height Parameterization of the Surface Energy Balance System (SEBS) over the Tibetan Plateau, *Journal of Applied Meteorology and Climatology*, 52(3), 607-622. <https://doi.org/10.1175/jamc-d-12-056.1>
- Chu, H., J. Chen, J. F. Gottgens, Z. Ouyang, R. John, K. Czajkowski, and R. Becker (2014), Net ecosystem methane and carbon dioxide exchanges in a Lake Erie coastal marsh and a nearby cropland, *Journal of Geophysical Research: Biogeosciences*, 119(5), 722-740. <https://doi.org/10.1002/2013JG002520>
- Chu, H., et al. (2018), Temporal Dynamics of Aerodynamic Canopy Height Derived From Eddy Covariance Momentum Flux Data Across North American Flux Networks, *Geophysical Research Letters*, 45(17), 9275-9287. <https://doi.org/10.1029/2018GL079306>
- Clapp, R. B., and G. M. Hornberger (1978), Empirical equations for some soil hydraulic properties, *Water Resources Research*, 14(4), 601-604. <https://doi.org/10.1029/WR014i004p00601>
- Cosby, B. J., G. M. Hornberger, R. B. Clapp, and T. R. Ginn (1984), A Statistical Exploration of the Relationships of Soil Moisture Characteristics to the Physical Properties of Soils, *Water Resources Research*, 20(6), 682-690. <https://doi.org/10.1029/WR020i006p00682>
- Dempster, A. P., N. M. Laird, and D. B. Rubin (1977), Maximum Likelihood from Incomplete Data Via the EM Algorithm, *Journal of the Royal Statistical Society: Series B (Methodological)*, 39(1), 1-22. <https://doi.org/10.1111/j.2517-6161.1977.tb01600.x>

- Du, K.-L., and M. N. S. Swamy (2014), Multilayer Perceptrons: Architecture and Error Backpropagation, in *Neural Networks and Statistical Learning*, edited, pp. 83-126, Springer London, London. [https://doi.org/10.1007/978-1-4471-5571-3\\_4](https://doi.org/10.1007/978-1-4471-5571-3_4)
- Eder, F., M. Schmidt, T. Damian, K. Träumner, and M. Mauder (2015), Mesoscale Eddies Affect Near-Surface Turbulent Exchange: Evidence from Lidar and Tower Measurements, *Journal of Applied Meteorology and Climatology*, 54(1), 189-206. <https://doi.org/10.1175/jamc-d-14-0140.1>
- Fisher, J. B., K. P. Tu, and D. D. Baldocchi (2008), Global estimates of the land-atmosphere water flux based on monthly AVHRR and ISLSCP-II data, validated at 16 FLUXNET sites, *Remote Sensing of Environment*, 112(3), 901-919. <https://doi.org/10.1016/j.rse.2007.06.025>
- Griffis, T. J., J. M. Baker, S. D. Sargent, M. Erickson, J. Corcoran, M. Chen, and K. Billmark (2010), Influence of C4 vegetation on  $^{13}\text{C}$  discrimination and isoforcing in the upper Midwest, United States, *Global Biogeochemical Cycles*, 24(4). <https://doi.org/10.1029/2009GB003768>
- Hanan, N. P., J. A. Berry, S. B. Verma, E. A. Walter-Shea, A. E. Suyker, G. G. Burba, and A. S. Denning (2005), Testing a model of  $\text{CO}_2$ , water and energy exchange in Great Plains tallgrass prairie and wheat ecosystems, *Agricultural and Forest Meteorology*, 131(3), 162-179. <https://doi.org/10.1016/j.agrformet.2005.05.009>
- Hatala, J. A., M. Detto, and D. D. Baldocchi (2012), Gross ecosystem photosynthesis causes a diurnal pattern in methane emission from rice, *Geophysical Research Letters*, 39(6). <https://doi.org/10.1029/2012GL051303>
- Hemes, K. S., S. D. Chamberlain, E. Eichelmann, T. Anthony, A. Valach, K. Kasak, D. Szutu, J. Verfaillie, W. L. Silver, and D. D. Baldocchi (2019), Assessing the carbon and climate benefit of restoring degraded agricultural peat soils to managed wetlands, *Agricultural and Forest Meteorology*, 268. <https://doi.org/10.1016/j.agrformet.2019.01.017>
- Knox, S. H., C. Sturtevant, J. H. Matthes, L. Koteen, J. Verfaillie, and D. Baldocchi (2015), Agricultural peatland restoration: effects of land-use change on greenhouse gas ( $\text{CO}_2$  and  $\text{CH}_4$ ) fluxes in the Sacramento-San Joaquin Delta, *Global Change Biology*, 21(2), 750-765. <https://doi.org/10.1111/gcb.12745>
- Korres, W., T. G. Reichenau, and K. Schneider (2013), Patterns and scaling properties of surface soil moisture in an agricultural landscape: An ecohydrological modeling study, *Journal of Hydrology*, 498, 89-102. <https://doi.org/10.1016/j.jhydrol.2013.05.050>
- Kutsch, W. L., et al. (2010), The net biome production of full crop rotations in Europe, *Agriculture, Ecosystems & Environment*, 139(3), 336-345. <https://doi.org/10.1016/j.agee.2010.07.016>
- Lamb, B., and S. Pressley (2019a), AmeriFlux AmeriFlux US-RC1 Cook Agronomy Farm - No



- Till, edited, United States. <https://doi.org/10.17190/AMF/1498748>
- Lamb, B., and S. Pressley (2019b), AmeriFlux AmeriFlux US-RC2 Cook Agronomy Farm - Conventional Till, edited, United States. <https://doi.org/10.17190/AMF/1498747>
- Lamb, B., and S. Pressley (2019c), AmeriFlux AmeriFlux US-RC3 WSU Lind Dryland Research Station, edited, United States. <https://doi.org/10.17190/AMF/1498749>
- Lamb, B., and S. Pressley (2019d), AmeriFlux AmeriFlux US-RC4 Moscow Mountain on-farm site, edited, United States. <https://doi.org/10.17190/AMF/1498750>
- Loubet, B., et al. (2011), Carbon, nitrogen and Greenhouse gases budgets over a four years crop rotation in northern France, *Plant and Soil*, 343(1/2), 109-137. <https://doi.org/10.1007/s11104-011-0751-9>
- Mallick, K., et al. (2015), Reintroducing radiometric surface temperature into the Penman-Monteith formulation, *Water Resources Research*, 51(8), 6214-6243. <https://doi.org/10.1002/2014WR016106>
- Mallick, K., et al. (2014), A Surface Temperature Initiated Closure (STIC) for surface energy balance fluxes, *Remote Sensing of Environment*, 141, 243-261. <https://doi.org/10.1016/j.rse.2013.10.022>
- Mallick, K., et al. (2016), Canopy-scale biophysical controls of transpiration and evaporation in the Amazon Basin, *Hydrol. Earth Syst. Sci.*, 20(10), 4237-4264. <https://doi.org/10.5194/hess-20-4237-2016>
- Martre, P., et al. (2015), Multimodel ensembles of wheat growth: many models are better than one, *Global Change Biology*, 21(2), 911-925. <https://doi.org/10.1111/gcb.12768>
- Meijide, A., G. Manca, I. Goded, V. Magliulo, P. di Tommasi, G. Seufert, and A. Cescatti (2011), Seasonal trends and environmental controls of methane emissions in a rice paddy field in Northern Italy, *Biogeosciences*, 8(12), 3809-3821. <https://doi.org/10.5194/bg-8-3809-2011>
- Moors, E. J., et al. (2010), Variability in carbon exchange of European croplands, *Agriculture, Ecosystems & Environment*, 139(3), 325-335. <https://doi.org/10.1016/j.agee.2010.04.013>
- Moureaux, C., A. Debaq, B. Bodson, B. Heinesch, and M. Aubinet (2006), Annual net ecosystem carbon exchange by a sugar beet crop, *Agricultural and Forest Meteorology*, 139(1), 25-39. <https://doi.org/10.1016/j.agrformet.2006.05.009>
- Muramatsu, K., K. Ono, N. Soyama, T. Juthasinee, A. Miyata, and M. Mano (2017), Determination of rice paddy parameters in the global gross primary production capacity estimation algorithm using 6 years of JP-MSE flux observation data, *Journal of Agricultural Meteorology*, 73(3), 119-132. <https://doi.org/10.2480/agrmet.D-16-00017>
- Raftery, A. E., T. Gneiting, F. Balabdaoui, and M. Polakowski (2005), Using Bayesian model

- averaging to calibrate forecast ensembles, *Monthly Weather Review*, 133(5), 1155-1174.  
<https://doi.org/10.1175/MWR2906.1>
- Ranucci, S., T. Bertolini, L. Vitale, P. Tommasi, L. Ottaiano, M. Oliva, U. Amato, A. Fierro, and V. Magliulo (2011), The influence of management and environmental variables on soil N<sub>2</sub>O emissions in a crop system in Southern Italy, *Plant and Soil*, 343.  
<https://doi.org/10.1007/s11104-010-0674-x>
- Rawls, W. J., and D. L. Brakensiek (1985), Prediction of soil water properties for hydrologic modeling. In *Watershed management in the eighties* (pp. 293-299). New York, NY: Proceedings of the American Society of Civil Engineers.
- Raz-Yaseef, N., D. P. Billesbach, M. L. Fischer, S. C. Biraud, S. A. Gunter, J. A. Bradford, and M. S. Torn (2015), Vulnerability of crops and native grasses to summer drying in the U.S. Southern Great Plains, *Agriculture, Ecosystems & Environment*, 213, 209-218.  
<https://doi.org/10.1016/j.agee.2015.07.021>
- Sabbatini, S., N. Arriga, B. Gioli, D. Papale, A. Boschi, and M. Tomassucci (2016), FLUXNET2015 IT-CA2 Castel d'Asso2, edited, Italy. <https://doi.org/10.18140/FLX/1440231>
- Scrucca, L. (2013), GA: A Package for Genetic Algorithms in R, *Journal of Statistical Software*, 53(4), 1 - 37. <https://doi.org/10.18637/jss.v053.i04>
- Su, Z. (2002), The Surface Energy Balance System (SEBS) for estimation of turbulent heat fluxes, *Hydrol. Earth Syst. Sci.*, 6(1), 85-100. <https://doi.org/10.5194/hess-6-85-2002>
- Suyker, A. E., and S. B. Verma (2012), Gross primary production and ecosystem respiration of irrigated and rainfed maize–soybean cropping systems over 8 years, *Agricultural and Forest Meteorology*, 165, 12-24. <https://doi.org/10.1016/j.agrformet.2012.05.021>
- van Genuchten, M. T. (1980), A Closed-form Equation for Predicting the Hydraulic Conductivity of Unsaturated Soils, *Soil Science Society of America Journal*, 44(5), 892-898.  
<https://doi.org/10.2136/sssaj1980.03615995004400050002x>
- Vereecken, H., J. Maes, J. Feyen, and P. Darius (1989), Estimating the soil moisture retention characteristic from texture, bulk density, and carbon content, *Soil Science*, 148(6), 389-403.
- Verma, S. B., et al. (2005), Annual carbon dioxide exchange in irrigated and rainfed maize-based agroecosystems, *Agricultural and Forest Meteorology*, 131(1), 77-96.  
<https://doi.org/10.1016/j.agrformet.2005.05.003>
- Vinukollu, R. K., E. F. Wood, C. R. Ferguson, and J. B. Fisher (2011), Global estimates of evapotranspiration for climate studies using multi-sensor remote sensing data: Evaluation of three process-based approaches, *Remote Sensing of Environment*, 115(3), 801-823.  
<https://doi.org/10.1016/j.rse.2010.11.006>

- Weiherrmüller, L., M. Herbst, M. Javaux, and M. Weynants (2017), Erratum to “Revisiting Vereecken Pedotransfer Functions: Introducing a Closed-Form Hydraulic Model”, *Vadose Zone Journal*, 16(1), vzj2008.0062er. <https://doi.org/10.2136/vzj2008.0062er>
- Weynants, M., H. Vereecken, and M. Javaux (2009), Revisiting Vereecken Pedotransfer Functions: Introducing a Closed-Form Hydraulic Model, *Vadose Zone Journal*, 8(1), 86-95. <https://doi.org/10.2136/vzj2008.0062>
- Yang, K., et al. (2018), Sun-induced chlorophyll fluorescence is more strongly related to absorbed light than to photosynthesis at half-hourly resolution in a rice paddy, *Remote Sensing of Environment*, 216, 658-673. <https://doi.org/10.1016/j.rse.2018.07.008>
- Yao, Y., et al. (2013), MODIS-driven estimation of terrestrial latent heat flux in China based on a modified Priestley–Taylor algorithm, *Agricultural and Forest Meteorology*, 171-172, 187-202. <https://doi.org/10.1016/j.agrformet.2012.11.016>
- Yebra, M., A. Van Dijk, R. Leuning, A. Huete, and J. P. Guerschman (2013), Evaluation of optical remote sensing to estimate actual evapotranspiration and canopy conductance, *Remote Sensing of Environment*, 129, 250-261. <https://doi.org/10.1016/j.rse.2012.11.004>
- Zhang, Y., and M. G. Schaap (2017), Weighted recalibration of the Rosetta pedotransfer model with improved estimates of hydraulic parameter distributions and summary statistics (Rosetta3), *Journal of Hydrology*, 547, 39-53. <https://doi.org/10.1016/j.jhydrol.2017.01.004>
